# Supplementary material for: Isoforms of Neuropilin-2 Denote Unique Tumor-Associated Macrophages in Breast Cancer
Source: Front Immunol. 2022 Apr 27;13:830169. doi: 10.3389/fimmu.2022.830169 (PMC9149656; doi:10.3389/fimmu.2022.830169)
Supplement: Supplementary Table 1 — Antibody panels used for spectral flow cytometry of mouse and human myeloid cells. [file Table_1.xlsx]

## Sheet: Markers
Mouse Spectral Cytometry Panel - General Immunophenotyping
Marker	Phenotype	Fluorochrome	Clone	Company	Cat#
CD11b	Myeloid cells	BUV395	M1/70	BD Phramingen	563553
LiveDead_Blue	Viability	UV450	NA	ThermoFisher	L34962
MHC Class II	Ag presentation	BUV496	2G9	BD Phramingen	750171
CD38	B cell pheno	BUV563	90/CD38	BD Phramingen	741271
CD27	B cell/NK pheno	BUV615	LG.3A10	BD Phramingen	751529
gd TCR	gd T cells	BUV661	V65	BD Phramingen	750766
CD127	T cell pheno/Treg	BUV737	SB/199	BD Phramingen	612841
F4/80	Systemic macrophage	BUV805	T45-2342	BD Phramingen	749282
NRP1 (CD304)	Unk TAM	BV421	3E12	BioLegend	145209
CD11c	Myeloid cells	eFluor450	N418	ThermoFisher	48-0114-82
Siglec-F (CD170)	Alveolar macrophage	BV480	E50-2440	BD Phramingen	746668
Ly-6G	Myeloid subsets	BV510	1A8	BioLegend	127633
CD19	B cells	BV570	6D5	BioLegend	115535
CD24	Dendritc Cell	BV605	M1/69	BioLegend	101827
CD64	Pulmonary macrophage	BV650	X54-5/7.1	BD Phramingen	740622
CD206	Wound healing	BV711	C068C2	BioLegend	141727
CD49b	NK cells	BV750	HMα2	BD Phramingen	746974
PD-L1	Immunosuppressive	BV785	10F.9G2	BioLegend	124331
Arginase1	M2-like	AlexaFluor488	A1exF5	ThermoFisher	53-3697-82
CD45	Leukocytes	AlexaFluor532	30-F11	ThermoFisher	58-0451-82
CD3	T cells	Spark Blue550	17A2	BioLegend	100260
CD8	Cytotoxic T cells	PerCP	53-6.7	BioLegend	100732
CD103	DC pheno	BB700	2E7	BD Phramingen	748240
CD317	pDCs	PerCP-eFluor710	eBio927	ThermoFisher	46-3172-82
Neuropilin-2b	Unk TAM	PE	9080	Gemmill (MUSC)/Millipore Sigma	ABN2262
iNOS	M1-like	PE-eFluor610	CXNFT	ThermoFisher	61-5920-82
CD86	Inflammatory	PE-Cy5	GL-1	BioLegend	105016
TMEM119	Microglia	PE-Cy7	V3RT1GOsz	ThermoFisher	25-6119-82
Neuropilin-2 Total	Unk TAM	APC	257103	R&D Systems	FAB22151A
CD25	T cell pheno/Treg	Spark NIR 685	PC61	BioLegend	102070
CSF1R (CD115)	Monocyte/macropahge	R718	T38-320	BD Phramingen	751995
Ly-6C	Myeloid subsets	APC/Fire750	HK1.4	BioLegend	128046
CD4	Helper T cells	APC/Fire810	GK1.5	BioLegend	100480
Human Spectral Cytometry Panel - Myeloid Phenotyping
Marker	Phenotype	Fluorochrome	Clone	Company	Cat#
MET	HGF receptor	BUV395	3D6	BD	742878
LiveDead_Blue	Viability	UV450	NA	ThermoFisher	L34962
CSF1R	CD115	BUV496	9-4D2-1E4	BD	750489
CD73	ecto-5'-nucleotidase	BUV563	AD2	BD	748585
CD15	Neutrophil	BUV615	W6D3	BD	751550
C1q R1	CD93	BUV661	R139	BD	750575
VISTA	Immunosuppression	BUV737	MIH65.rMAb	BD	749648
EpCAM	CD326	BUV805	EBA-1	BD	748396
CD68	Macrosialin	BV421	Y1/82A	BioLegend	333828
HLA-DR	MHC class II	eFluor450	LN3	ThermoFisher	48-9956-42
CD206	MMR, MRC1 (M2-like)	BV480	19.2	BD	746279
CD11b	Myeloid cells	BV510	M1/70	BioLegend	101263
CD16	Monocyte	BV570	3G8	BioLegend	302036
CCR2	Chemotaxis/phenotyping	BV605	K036C2	BioLegend	357214
CX3CR1	Chemotaxis/phenotyping	BV650	2A9-1	BioLegend	341626
CD39	NTPDase1	BV711	TU66	BD	563680
CD163	SCARI1 (M2-like)	BV750	GHI/61	BD	747185
CD86	B7-2 (M1-like)	BV786	IT2.2	BioLegend	305442
TIE2	Vascular Mac	AlexaFluor488	33.1 (Ab33)	BioLegend	334208
CD45	Leukocytes	AlexaFluor532	HI30	ThermoFisher	58-0459-42
CD14	Monocyte	Spark Blue550	63D3	BioLegend	367148
HIF-1a	Hypoxia	PerCP	241812	R&D Systems	IC1935C
CD66b	Granulocyte	PerCP-Cy5.5	QA17A51	BioLegend	396914
NRP1	CD304	BB700	U21-1283	BD	745901
phospho(641)-STAT6	Alternative Mac activation	PerCP-eFluor710	CHI2S4N	ThermoFisher	46-9013-42
Neuropilin-2b	NRP2b	PE (Custom Conjugate)	9080	Gemmill (MUSC)/Millipore Sigma	ABN2262
Phospho-STAT1 (Tyr701)	Inflammatory Mac	PE-eFluor610	KIKSI0803	ThermoFisher	61-9008-42
PD-L1	Immunosuppression	PE-Cy5	MIH1	ThermoFisher	15-5983-42
Arginase1	M2-like	PE-Cy7	A1exF5	ThermoFisher	25-3697-82
Neuropilin-2 Total	NRP2	APC	257103	R&D Systems	FAB22151A
IRF5	Inflammatory Mac	AlexaFluor700	Polyclonal	R&D Systems	IC4508N
Glut1	Glucose transport	AlexaFluor750	202915	R&D Systems	FAB1418S-100UG

## Sheet: Phenotyping
Ref	Phenotyping (all CD45+)		Notes: All myeloid cells examined following removal of lineage positive cells (CD3, CD19, CD49b)
1,2,3,4,5	Alveolar Macs (lung)	CD64+ Siglec-F+ CD11c+ CD11b— F4/80+(3,5) F4/80—(4) Ly6C—(5)	AMs are also high side scatter and high autoflourescence. Conventional AMs are Siglec-Fhigh and monocyte-derived pulmonary AMs are Siglec-FInt
2,4	Interstitial Macs (lung)	CD11b+ F4/80+ Ly6C— CD64+ CD24—	Can be further divided into MHCII+ and MHCII—
4,5	Monocytes (lung)	CD64Int Ly6CInt/+ CD11b+ CD11c— Siglec-F— F4/80Low CD115+
2,3	Conventional Dendritic Cells (lung)	F4/80— CD11b+ CD11c+ MHCII+ CD24+ CD64—	Can also be CD11b— CD11c+ CD24+ CD103+ MHCII+
4	CD103 DCs (lung)	CD11b+ CD24+ CD103+ CD11b—
3	Plasmacytoid DCs	CD11cInt PDCA-1+ Ly6C+	Also express B220 which is shared with B cells
1,3	Eosinophils	CD64— Siglec-F+ CD11c— F4/80+ CD11b+ SSChigh MHCII—
1,3	Neutrophils	CD64— Ly6CLow/— Ly6G+ CD11c— CD11b+ SSChigh MHCII— CD115—
2	Basophils (peripheral blood)	CD45Int
2	Microglia (brain)	CD45Int CD11b+ F4/80+ Ly6C—
3	Natuaral Killer cells	CD3— CD11bInt CD49b+
	Natuaral Killer T cells	CD3+ CD11bInt CD49b+
	CD4+ T cell	CD3+ CD4+
	CD8+ T cell	CD3+ CD8+
	Regulatory T cell	CD3+ CD4+ CD25+ CD127—
	gd T cell	CD3+ gdTCR+
	B cell	CD3— CD11b— CD19+
	Naïve B cell	CD3— CD11b— CD19+ CD27— CD38—	Can also define germianl center, antibody secreting, and non-switched "activated" B cells, but check on use of CD27 instead of IgD
	Memory B cell	CD3— CD11b— CD19+ CD27+ CD38—
			Examine CD80, CD40, VISTA, CD172a (SIRPs, ligand for CD47), EpCAM
			CD64 is monocyte/mac specific, F4/80 is expressed on monocytes, DCs, and granulocytes
	Refs
1	Poczobutt JM, JI, 2016
2	Liu Z, STAR Protocols, 2020
3	Misharin AV, Am J Respir Cell Mol Biol, 2013
4	Nayak DK, Jove, 2018
