# Supplementary material for: Isoforms of Neuropilin-2 Denote Unique Tumor-Associated Macrophages in Breast Cancer
Source: Front Immunol. 2022 Apr 27;13:830169. doi: 10.3389/fimmu.2022.830169 (PMC9149656; doi:10.3389/fimmu.2022.830169)
Supplement: Supplementary Table 2 — Target and primer details for single-cell qPCR of murine TAMs. [file Table_2.xlsx]

## Sheet: Assays
Target	Assay ID	Assay Name	FP	RP	Design RefSeq	Blast Hits	Gene Aliases	Gene Full Name	GO Function	GO Process	GO Component
AGER	GEP00089479	AGER_89479_i1	AGGAGGTCAAGTCCAACTACC	GAGTTCAGAGGCAGGATCCA	NR_073175.N	NM_007425|NR_073175|NR_073173|NM_001271424|NM_001271423|NR_073176|NM_001271422	RAGE	advanced glycosylation end product-specific receptor	S100 protein binding|S100 protein binding|advanced glycation end-product binding|advanced glycation end-product receptor activity|heparin binding|high mobility group box 1 binding|identical protein binding|protein binding|signaling receptor activity	JAK-STAT cascade|astrocyte development|calcium ion homeostasis|cellular response to amyloid-beta|glucose mediated signaling pathway|induction of positive chemotaxis|inflammatory response|learning or memory|modulation of age-related behavioral decline|negative regulation of advanced glycation end-product receptor activity|negative regulation of advanced glycation end-product receptor activity|nega…	apical plasma membrane|axon|basal plasma membrane|cell junction|cell surface|cytoplasm|cytosol|external side of plasma membrane|extracellular region|extracellular region|extracellular space|fibrillar center|integral component of membrane|membrane|neuronal cell body|nucleus|plasma membrane
AMOT	GEP00089476	AMOT_89476_i7	AGCGTTGCTTGGACATGGAA	AGCACCTTGATCATGGCATCC	NM_153319.N	NM_153319|NM_001290274	Sii6|CAG-2|D0Kist1	angiomotin	angiostatin binding|identical protein binding|protein binding|signaling receptor activity	actin cytoskeleton organization|actin cytoskeleton organization|angiogenesis|blood vessel endothelial cell migration|blood vessel morphogenesis|cell migration involved in gastrulation|cellular protein localization|cellular protein localization|chemotaxis|establishment of cell polarity involved in ameboidal cell migration|establishment of cell polarity involved in ameboidal cell migration|gastrula…	COP9 signalosome|actin filament|bicellular tight junction|bicellular tight junction|bicellular tight junction|cell junction|cell surface|cytoplasm|cytoplasmic vesicle|cytoplasmic vesicle|endocytic vesicle|external side of plasma membrane|integral component of membrane|lamellipodium|lamellipodium|lamellipodium|nucleus|plasma membrane|ruffle|stress fiber
ARG1	GEA00042725	ARG1_42725_i5	GGATTGGCAAGGTGATGGAA	CGACATCAAAGCTCAGGTGAA	NM_007482.3	NM_007482.3	AI|PGIF|Arg-1|AI256583	arginase, liver	arginase activity|arginase activity|arginase activity|hydrolase activity|hydrolase activity, acting on carbon-nitrogen (but not peptide) bonds, in linear amidines|manganese ion binding|manganese ion binding|metal ion binding	adaptive immune response|arginine catabolic process to ornithine|arginine catabolic process to ornithine|arginine metabolic process|collagen biosynthetic process|defense response to protozoan|immune system process|innate immune response|negative regulation of T cell proliferation|negative regulation of T-helper 2 cell cytokine production|negative regulation of activated T cell proliferation|negat…	cytoplasm|cytoplasm|cytosol|extracellular space|mitochondrial outer membrane|neuron projection|neuronal cell body|nucleus
ARHGEF6	GEP00089487	ARHGEF6_89487_i14	ACCAACCTCTTGCGGTTCA	GGCTGTCCGGTAGAGCTAAAA	NM_152801.N	NM_152801	alpha-PIX|1600028C08Rik|1700038J06Rik|4930592P22Rik	Rac/Cdc42 guanine nucleotide exchange factor (GEF) 6	Rho guanyl-nucleotide exchange factor activity|guanyl-nucleotide exchange factor activity|protein binding	intracellular signal transduction|lamellipodium assembly|regulation of Rho protein signal transduction	cell projection|cell-cell junction|lamellipodium
ATG5	GEP00089490	ATG5_89490_i6	CCTCAGAGAAGTCTGTCCTTCC	TCCAGCATTGGCTCTATCCC	NM_053069.N	NM_053069|NM_001314013	Apg5l|Atg5l|Paddy|C88337|AW319544|2010107M05Rik|3110067M24Rik	autophagy related 5	Atg8 ligase activity|protein binding	C-terminal protein lipidation|aggrephagy|aggrephagy|antigen processing and presentation of endogenous antigen|antigen processing and presentation of endogenous antigen|apoptotic process|autophagosome assembly|autophagosome assembly|autophagy|autophagy|autophagy of host cells involved in interaction with symbiont|autophagy of mitochondrion|autophagy of mitochondrion|autophagy of nucleus|blood vess…	Atg12-Atg5-Atg16 complex|ER-mitochondrion membrane contact site|autophagosome|autophagosome|axoneme|cytoplasm|membrane|phagophore assembly site membrane|phagophore assembly site membrane
B3GNT3	GEP00089494	B3GNT3_89494_i1	TCTCCAGTGGGATTTCCATGAC	GTTAGCTGCCACTCCAGGAA	NM_028189.N	NM_028189	2210008L19Rik	UDP-GlcNAc:betaGal beta-1,3-N-acetylglucosaminyltransferase 3	N-acetyllactosaminide beta-1,3-N-acetylglucosaminyltransferase activity|N-acetyllactosaminide beta-1,3-N-acetylglucosaminyltransferase activity|acetylgalactosaminyltransferase activity|acetylglucosaminyltransferase activity|beta-1,3-galactosyl-O-glycosyl-glycoprotein beta-1,3-N-acetylglucosaminyltransferase activity|galactosyltransferase activity|transferase activity|transferase activity, transfe…	poly-N-acetyllactosamine biosynthetic process|poly-N-acetyllactosamine biosynthetic process|protein O-linked glycosylation|protein glycosylation|protein glycosylation	Golgi apparatus|Golgi apparatus|cellular_component|endoplasmic reticulum|integral component of membrane|membrane|membrane
BECN1	GEP00082999	BECN1_82999_i7	TGTCTTCAATGCCACCTTCC	CAAGCGACCCAGTCTGAAA	NM_019584.N	NM_019584	Atg6	beclin 1, autophagy related	GTPase binding|phosphatidylinositol 3-kinase binding|protein binding|protein homodimerization activity|protein kinase binding|ubiquitin protein ligase binding	amyloid-beta metabolic process|angiogenesis|apoptotic process|autophagosome assembly|autophagosome assembly|autophagosome assembly|autophagy|autophagy|autophagy of mitochondrion|autophagy of mitochondrion|cell cycle|cell division|cellular response to glucose starvation|cellular response to nitrogen starvation|defense response to virus|early endosome to late endosome transport|endocytosis|engulfme…	Golgi apparatus|autophagosome|cytoplasm|cytoplasm|cytoplasmic vesicle|cytoskeleton|dendrite|endoplasmic reticulum|endosome|extrinsic component of membrane|extrinsic component of membrane|membrane|mitochondrion|nucleus|phagocytic vesicle|phagophore assembly site|phosphatidylinositol 3-kinase complex, class III|phosphatidylinositol 3-kinase complex, class III, type I|phosphatidylinositol 3-kinase c…
C5AR2	GEP00089474	C5AR2_89474_e1	AGGGTGCAGATCATCGAACA	ACAGCAGAAGGCACAGTCA	NM_176912.N	NM_176912|NM_001146005	C5L2|Gpr77|E030029A11Rik	complement component 5a receptor 2	G-protein coupled receptor activity|complement component C5a receptor activity|complement receptor activity	G-protein coupled receptor signaling pathway|chemotaxis|complement receptor mediated signaling pathway|inflammatory response|leukocyte migration|negative regulation of interleukin-6 secretion|negative regulation of neutrophil chemotaxis|negative regulation of tumor necrosis factor production|phospholipase C-activating G-protein coupled receptor signaling pathway|positive regulation of ERK1 and ER…	apical part of cell|basal plasma membrane|integral component of membrane|membrane|plasma membrane
Ccl17	GEA00036447	Ccl17_36447_i1	CAGGAAGTTGGTGAGCTGGTA	CTTGCCCTGGACAGTCAGAA	NM_011332.3	NM_011332.3	Tarc|Abcd-2|Scya17|Scya17l	chemokine (C-C motif) ligand 17	CCR chemokine receptor binding|CCR4 chemokine receptor binding|chemokine activity|cytokine activity	G-protein coupled receptor signaling pathway|cellular defense response|cellular response to interferon-gamma|cellular response to interleukin-1|cellular response to tumor necrosis factor|chemokine-mediated signaling pathway|chemotaxis|inflammatory response|lymphocyte chemotaxis|monocyte chemotaxis|negative regulation of myoblast differentiation|neutrophil chemotaxis|positive regulation of ERK1 an…	extracellular space
Ccl2	GEA00036445	Ccl2_36445_i1	AGCAGCAGGTGTCCCAAA	TTCTTGGGGTCAGCACAGAC	NM_011333.3	NM_011333.3	JE|HC11|MCAF|MCP1|MCP-1|Scya2|Sigje|SMC-CF|AI323594	chemokine (C-C motif) ligand 2	CCR chemokine receptor binding|CCR2 chemokine receptor binding|CCR2 chemokine receptor binding|G-protein coupled receptor binding|chemokine activity|chemokine activity|cytokine activity|heparin binding|protein binding	G-protein coupled receptor signaling pathway|angiogenesis|antimicrobial humoral immune response mediated by antimicrobial peptide|cellular calcium ion homeostasis|cellular response to interferon-gamma|cellular response to interferon-gamma|cellular response to interleukin-1|cellular response to interleukin-1|cellular response to lipopolysaccharide|cellular response to tumor necrosis factor|cellula…	C-fiber|axon terminus|cytoplasm|dendrite|endocytic vesicle|extracellular region|extracellular space|extracellular space|extracellular space|neuronal cell body|perikaryon|perinuclear region of cytoplasm|rough endoplasmic reticulum|synapse
Ccl22	GEA00036446	Ccl22_36446_i0	CCTTCTTGCTGTGGCAATTCA	GGCAGCAGATACTGTCTTCCA	NM_009137.2	NM_009137.2	MDC|DCBCK|ABCD-1|Scya22	chemokine (C-C motif) ligand 22	CCR chemokine receptor binding|chemokine activity|cytokine activity	G-protein coupled receptor signaling pathway|cell chemotaxis|cellular response to interferon-gamma|cellular response to interleukin-1|cellular response to tumor necrosis factor|chemokine-mediated signaling pathway|chemotaxis|immune response|inflammatory response|lymphocyte chemotaxis|monocyte chemotaxis|neutrophil chemotaxis|positive regulation of ERK1 and ERK2 cascade|positive regulation of GTPa…	extracellular region|extracellular space
Ccl5	GEA00002379	Ccl5_2379_i1	GTGCCCACGTCAAGGAGTA	GCGGTTCCTTCGAGTGACA	NM_013653.3	NM_013653.3	SISd|Scya5|RANTES|TCP228|MuRantes	chemokine (C-C motif) ligand 5	CCR chemokine receptor binding|CCR1 chemokine receptor binding|CCR1 chemokine receptor binding|CCR4 chemokine receptor binding|CCR5 chemokine receptor binding|chemoattractant activity|chemokine activity|chemokine activity|chemokine receptor antagonist activity|chemokine receptor binding|cytokine activity|heparin binding|identical protein binding|phosphatidylinositol phospholipase C activity|phosp…	G-protein coupled receptor signaling pathway|G-protein coupled receptor signaling pathway|MAPK cascade|T-helper 1 cell diapedesis|activation of phospholipase D activity|calcium ion transport|cell-cell signaling|cellular calcium ion homeostasis|cellular response to interferon-gamma|cellular response to interleukin-1|cellular response to organic cyclic compound|cellular response to tumor necrosis f…	cytoplasm|extracellular region|extracellular space|extracellular space|extracellular space
Ccr2	GEA00002398	Ccr2_2398_i0	TGCCATCATAAAGGAGCCATA	TAGCACATGTGGTGAATCCA	NM_009915.2	NM_009915.2	Ckr2|Ccr2a|Ccr2b|Ckr2a|Ckr2b|mJe-r|Cmkbr2|Cc-ckr-2	chemokine (C-C motif) receptor 2	C-C chemokine receptor activity|G-protein coupled receptor activity|chemokine (C-C motif) ligand 12 binding|chemokine (C-C motif) ligand 2 binding|chemokine (C-C motif) ligand 7 binding|chemokine receptor activity|cytokine binding|protein binding|signal transducer activity	G-protein coupled receptor signaling pathway|T-helper 17 cell chemotaxis|angiogenesis|apoptotic cell clearance|blood vessel remodeling|cellular defense response|cellular homeostasis|chemotaxis|cytokine-mediated signaling pathway|hemopoiesis|homeostasis of number of cells within a tissue|humoral immune response|immune response|inflammatory response|leukocyte adhesion to vascular endothelial cell|m…	external side of plasma membrane|integral component of membrane|integral component of plasma membrane|membrane|plasma membrane|plasma membrane
CD274	GEA00022894	CD274_22894_i1	CAGCCTGCTGTCACTTGCTA	GACGTTGCTGCCATACTCCA	NM_021893.3	NM_021893.3	B7h1|Pdl1|Pdcd1l1|Pdcd1lg1|A530045L16Rik	CD274 antigen	protein binding	T cell costimulation|T cell costimulation|cell surface receptor signaling pathway|cell surface receptor signaling pathway|cellular response to lipopolysaccharide|immune response|immune response|negative regulation of T cell proliferation|negative regulation of T cell proliferation|negative regulation of activated T cell proliferation|negative regulation of interferon-gamma production|negative reg…	cell surface|cell surface|external side of plasma membrane|external side of plasma membrane|extracellular exosome|integral component of membrane|membrane|plasma membrane
CD36	GEA00047257	CD36_47257_i9	GGTGTGCTAGACATTGGCAAA	GACTTGCATGTAGGAAATGTGGAA	NM_001159555.1	NM_001159558.1|NM_001159557.1|NM_001159556.1|NM_001159555.1|NM_007643.4	FAT|GPIV|Scarb3	CD36 molecule	Toll-like receptor binding|high-density lipoprotein particle binding|lipid binding|lipid binding|lipoprotein particle binding|lipoteichoic acid receptor activity|low-density lipoprotein particle binding|low-density lipoprotein particle binding|low-density lipoprotein particle receptor activity|low-density lipoprotein particle receptor activity|oleic acid binding|oxidised low-density lipoprotein p…	amyloid fibril formation|apoptotic cell clearance|cGMP-mediated signaling|cell adhesion|cell surface receptor signaling pathway|cellular response to amyloid-beta|cellular response to bacterial lipopeptide|cellular response to diacyl bacterial lipopeptide|cellular response to hydroperoxide|cellular response to lipopolysaccharide|cellular response to lipoteichoic acid|cellular response to lipoteich…	Golgi apparatus|Golgi apparatus|apical part of cell|apical part of cell|brush border membrane|brush border membrane|caveola|cell surface|cell surface|endoplasmic reticulum|external side of plasma membrane|integral component of membrane|intracellular|intracellular membrane-bounded organelle|membrane|membrane raft|membrane raft|mitochondrion|plasma membrane|plasma membrane|protein-containing comple…
Cd86	GEA00013426	Cd86_13426_i1	CATGGGCTTGGCAATCCTTA	CATTGAAATAAGCTTGCGTCTCC	NM_019388.3	NM_019388.3	B7|B70|MB7|B7-2|B7.2|CLS1|Ly58|ETC-1|Ly-58|MB7-2|Cd28l2|TS/A-2	CD86 antigen	signaling receptor binding	B cell activation|T cell costimulation|adaptive immune response|cell surface receptor signaling pathway|cellular response to lipopolysaccharide|cellular response to lipopolysaccharide|defense response to virus|immune response|immune system process|negative regulation of T cell anergy|negative regulation of T cell proliferation|positive regulation of T cell proliferation|positive regulation of T c…	cell surface|cell surface|external side of plasma membrane|external side of plasma membrane|extracellular exosome|integral component of membrane|intracellular membrane-bounded organelle|membrane|plasma membrane
CH25H	GEA00033074	CH25H_33074_e0	ACCTTCCACAAGGTGCATCA	CAGCTCCCAGAAGCTCATGTA	NM_009890.1	NM_009890.1	m25OH|AI462618	cholesterol 25-hydroxylase	C-4 methylsterol oxidase activity|cholesterol 25-hydroxylase activity|iron ion binding|metal ion binding|monooxygenase activity|oxidoreductase activity|oxidoreductase activity|steroid hydroxylase activity|steroid hydroxylase activity	B cell chemotaxis|cholesterol metabolic process|cholesterol metabolic process|lipid biosynthetic process|lipid metabolic process|lipid metabolic process|oxidation-reduction process|steroid biosynthetic process|steroid metabolic process|sterol biosynthetic process|sterol biosynthetic process	endoplasmic reticulum|endoplasmic reticulum membrane|integral component of membrane|membrane|membrane
Chil3	GEP00088234	Chil3_88234_i7	GCCCACCAGGAAAGTACACA	CCTCAGTGGCTCCTTCATTCA	NM_009892.N	NM_009892	Ym1|ECF-L|Chi3l3|AI505981	chitinase-like 3	beta-N-acetylhexosaminidase activity|carbohydrate binding|chitin binding|chitinase activity|chitinase activity|hydrolase activity|hydrolase activity, acting on glycosyl bonds	carbohydrate metabolic process|chitin catabolic process|inflammatory response|metabolic process|polysaccharide catabolic process	cytoplasm|cytoplasmic vesicle|endoplasmic reticulum|extracellular region|nucleus
CLEC5A	GEP00088273	CLEC5A_88273_i3	ACCATGCCTACAAGGAGCTA	AGGTGATTCGGAGAAGGAGAA	NM_001038604.N	NM_021364|NM_001038604	Mdl1|Ly100|MDL-1|Clecsf5	C-type lectin domain family 5, member a	carbohydrate binding|protein binding|virus receptor activity|virus receptor activity	immune system process|innate immune response|innate immune response|myeloid cell differentiation|negative regulation of apoptotic process|negative regulation of myeloid cell apoptotic process|osteoblast development|positive regulation of cytokine secretion	cell surface|cytosol|integral component of membrane|membrane|plasma membrane
Csf1r	GEA00011745	Csf1r_11745_i17	GACTGGCTAGGGACATCATGAA	TCTGGGGCCATCCACTTTAC	NM_001037859.2	NM_001037859.2	Fms|Fim2|CD115|Csfmr|Fim-2|CSF-1R|M-CSFR|M-CSF-R|AI323359	colony stimulating factor 1 receptor	ATP binding|MAP kinase kinase kinase activity|cytokine binding|cytokine binding|cytokine binding|growth factor binding|kinase activity|macrophage colony-stimulating factor receptor activity|macrophage colony-stimulating factor receptor activity|macrophage colony-stimulating factor receptor activity|mitogen-activated protein kinase kinase binding|nucleotide binding|protein binding|protein homodime…	axon guidance|cell differentiation|cell proliferation|cell-cell junction maintenance|cellular response to cytokine stimulus|cellular response to macrophage colony-stimulating factor stimulus|cellular response to macrophage colony-stimulating factor stimulus|cellular response to macrophage colony-stimulating factor stimulus|cytokine-mediated signaling pathway|forebrain neuron differentiation|hemop…	CSF1-CSF1R complex|CSF1-CSF1R complex|cell surface|cytoplasm|integral component of membrane|integral component of plasma membrane|intracellular membrane-bounded organelle|membrane|nucleoplasm|plasma membrane|plasma membrane|receptor complex
CX3CR1	GEA00035248	CX3CR1_35248_i0	TCCTGCAGAAGTTCCCTTCC	GCCACAATGTCGCCCAAATA	NM_009987.3	NM_009987.3		chemokine (C-X3-C motif) receptor 1	C-X3-C chemokine binding|C-X3-C chemokine receptor activity|G-protein coupled receptor activity|cytokine receptor activity	G-protein coupled receptor signaling pathway|cell adhesion|cerebral cortex cell migration|chemotaxis|cytokine-mediated signaling pathway|macrophage chemotaxis|memory|microglial cell activation|microglial cell activation involved in immune response|negative regulation of angiogenesis|negative regulation of cell migration|negative regulation of chronic inflammatory response to non-antigenic stimulu…	integral component of membrane|membrane|neuron projection|neuronal cell body membrane|nucleoplasm|nucleus|perinuclear region of cytoplasm|plasma membrane
CXCL1	GEA00002481	CXCL1_2481_i2	CCTGAAGCTCCCTTGGTTCA	TTCTCCGTTACTTGGGGACAC	NM_008176.3	NM_008176.3	KC|Fsp|N51|gro|Gro1|Mgsa|Scyb1	chemokine (C-X-C motif) ligand 1	CXCR chemokine receptor binding|chemokine activity|chemokine activity|cytokine activity|growth factor activity	G-protein coupled receptor signaling pathway|acute inflammatory response|chemokine-mediated signaling pathway|chemotaxis|defense response|immune response|inflammatory response|neutrophil chemotaxis|positive regulation of cytosolic calcium ion concentration|positive regulation of hematopoietic stem cell proliferation|positive regulation of leukocyte chemotaxis|positive regulation of neutrophil med…	extracellular region|extracellular space|extracellular space|extracellular space|extracellular space
CXCL12	GEA00011748	CXCL12_11748_i1	ACTCCAAACTGTGCCCTTCA	AATTTCGGGTCAATGCACAC	NM_021704.3	NM_001012477.2|NM_013655.4|NM_021704.3	Pbsf|Sdf1|Tlsf|Tpar1|Scyb12	chemokine (C-X-C motif) ligand 12	CXCR chemokine receptor binding|CXCR chemokine receptor binding|chemoattractant activity|chemokine activity|chemokine activity|chemokine activity|chemokine receptor binding|cytokine activity|growth factor activity|integrin binding	T cell proliferation|adult locomotory behavior|ameboidal-type cell migration|animal organ regeneration|axon guidance|brain development|branching involved in blood vessel morphogenesis|cell chemotaxis|cell chemotaxis|cell-cell adhesion|chemokine-mediated signaling pathway|chemokine-mediated signaling pathway|chemotaxis|defense response|detection of mechanical stimulus involved in sensory perceptio…	cytoplasm|external side of plasma membrane|external side of plasma membrane|extracellular region|extracellular space|plasma membrane
DCN	GEA00042844	DCN_42844_i3	TCCGACTTCAATGGACTGAACA	CTGGAAGGCTCCGTTTTCAA	NM_001190451.1	NM_001190451.1|NM_007833.5	DC|PG40|PGII|PGS2|DSPG2|SLRR1B	decorin	collagen binding|extracellular matrix binding|glycosaminoglycan binding|protein N-terminus binding	negative regulation of angiogenesis|negative regulation of endothelial cell migration|negative regulation of vascular endothelial growth factor signaling pathway|peptide cross-linking via chondroitin 4-sulfate glycosaminoglycan|positive regulation of autophagy|positive regulation of macroautophagy|positive regulation of mitochondrial depolarization|positive regulation of mitochondrial fission|pos…	collagen type VI trimer|extracellular matrix|extracellular region|extracellular space
DMD	GEP00089491	DMD_89491_i68	CGAGTTGCAAAGGGCCATAA	GAAGTCGCGAACATCTTCTCC	NM_007868.N	NM_001314037|NM_001314035|NM_001314038|NM_007868|NM_001314036|NM_001314034	dys|mdx|pke|Dp71|Dp427|DXSmh7|DXSmh9	dystrophin, muscular dystrophy	actin binding|dystroglycan binding|metal ion binding|myosin binding|nitric-oxide synthase binding|protein binding|structural constituent of muscle|vinculin binding|zinc ion binding	cardiac muscle cell action potential|cardiac muscle contraction|cellular protein localization|cellular protein localization|cellular protein-containing complex assembly|establishment of blood-nerve barrier|establishment of glial blood-brain barrier|muscle cell cellular homeostasis|muscle fiber development|muscle organ development|myotube cell development|negative regulation of ERK1 and ERK2 casca…	Z disc|cell junction|cell surface|cell-substrate junction|costamere|cytoplasm|cytoskeleton|dystrophin-associated glycoprotein complex|dystrophin-associated glycoprotein complex|filopodium|filopodium membrane|membrane|membrane raft|neuron projection terminus|nucleus|plasma membrane|postsynaptic membrane|protein-containing complex|sarcolemma|sarcolemma|synapse
DPYSL2	GEP00089495	DPYSL2_89495_i4	CCTCGTGTACATGGCTTTCA	GATCACGCTCAGCACTTCATA	NM_009955.N	NM_009955	DRP2|Crmp2|Ulip2|TOAD-64|AI851130|Musunc33	dihydropyrimidinase-like 2	hydrolase activity|hydrolase activity, acting on carbon-nitrogen (but not peptide) bonds|identical protein binding|microtubule binding|protein binding|protein kinase binding	axon guidance|brain development|cell differentiation|cytoskeleton organization|endocytosis|multicellular organism development|nervous system development|positive regulation of glutamate secretion|regulation of axon extension|regulation of neuron differentiation|regulation of neuron projection development|synaptic vesicle transport	axon|cell|cytoplasm|cytoskeleton|cytosol|dendrite|dendrite|growth cone|intracellular|membrane|microtubule|mitochondrion|myelin sheath|myelin sheath|neuron projection|neuronal cell body|neuronal cell body|plasma membrane|protein-containing complex|synapse|terminal bouton
EPAS1	GEA00017939	EPAS1_17939_i10	AAGCTTTTCGCCATGGACAC	CAAGGTCTCCAAATCCAGTTCAC	NM_010137.3	NM_010137.3	HLF|HRF|MOP2|HIF2A|bHLHe73|HIF-2alpha	endothelial PAS domain protein 1	DNA binding|DNA binding|DNA binding|DNA binding transcription factor activity|DNA binding transcription factor activity|RNA polymerase II transcription factor activity, sequence-specific DNA binding|cobalt ion binding|histone acetyltransferase binding|protein binding|protein dimerization activity|protein heterodimerization activity|protein heterodimerization activity|sequence-specific DNA binding…	angiogenesis|blood vessel remodeling|cell differentiation|cell maturation|cellular response to hypoxia|embryonic placenta development|erythrocyte differentiation|hemopoiesis|iron ion homeostasis|lung development|mitochondrion organization|multicellular organism development|myoblast fate commitment|negative regulation of transcription by RNA polymerase II|norepinephrine biosynthetic process|norepi…	cytoplasm|cytoplasm|nuclear speck|nucleus|nucleus|nucleus|transcription factor complex|transcription factor complex
ERBB4	GEP00089469	ERBB4_89469_i13	GTGTGACTCCCAGTGTGAGAA	GAGCACTTTGTGCAGTTGTCA	NM_010154.N	NM_010154	Her4|c-erbB-4	erb-b2 receptor tyrosine kinase 4	ATP binding|MAP kinase kinase kinase activity|epidermal growth factor receptor binding|epidermal growth factor receptor binding|kinase activity|mitogen-activated protein kinase kinase binding|neuregulin binding|nucleotide binding|protein binding|protein homodimerization activity|protein kinase activity|protein tyrosine kinase activity|protein tyrosine kinase activity|protein tyrosine kinase activ…	apoptotic process|cardiac muscle tissue regeneration|cell differentiation|cell fate commitment|cell migration|cellular response to epidermal growth factor stimulus|central nervous system morphogenesis|embryonic pattern specification|heart development|lactation|lactation|mammary gland alveolus development|mammary gland epithelial cell differentiation|mitochondrial fragmentation involved in apoptot…	basal plasma membrane|basolateral plasma membrane|caveola|cytoplasm|cytoplasm|integral component of membrane|integral component of plasma membrane|membrane|membrane raft|mitochondrion|nucleus|plasma membrane|postsynaptic density|receptor complex|receptor complex
Flt1	GEA00011863	Flt1_11863_i16	TTGCACGGGAGAGACTGAAA	GCCAAATGCAGAGGCTTGAA	NM_010228.3	NM_010228.3		FMS-like tyrosine kinase 1
GFRA2	GEP00089483	GFRA2_89483_i6	CTGGGGACCAGTGTCATCA	CTTTGGAGTTGTTGGCCTTCA	NM_008115.	NM_001302094|NM_008115|NM_001302095		glial cell line derived neurotrophic factor family receptor alpha 2	glial cell-derived neurotrophic factor receptor activity|glial cell-derived neurotrophic factor receptor activity|signaling receptor activity	negative regulation of protein autophosphorylation|nervous system development|nervous system development|positive regulation of peptidyl-serine phosphorylation of STAT protein|regulation of peptidyl-serine phosphorylation of STAT protein|signal transduction|transmembrane receptor protein tyrosine kinase signaling pathway	anchored component of membrane|external side of plasma membrane|membrane|plasma membrane|receptor complex
GPR15	GEP00089485	GPR15_89485_e0	CAGCTGTGTCAACCCTCTCA	ACAAGGGCACAGACAACGTA	NM_001162955.N	NM_001162955	4933439K08Rik	G protein-coupled receptor 15	G-protein coupled receptor activity|G-protein coupled receptor activity|coreceptor activity|virus receptor activity	G-protein coupled receptor signaling pathway|T cell migration|signal transduction|viral entry into host cell	cytoplasm|endosome|integral component of membrane|membrane|plasma membrane
Hif1a	GEA00012863	Hif1a_12863_i5	TCGACACAGCCTCGATATGAA	TTCCGGCTCATAACCCATCA	NM_010431.2	NM_010431.2	MOP1|bHLHe78|AA959795|HIF1alpha|HIF1-alpha|HIF-1-alpha	hypoxia inducible factor 1, alpha subunit	DNA binding|DNA binding|DNA binding transcription factor activity|DNA binding transcription factor activity|E-box binding|Hsp90 protein binding|RNA polymerase II transcription factor activity, sequence-specific DNA binding|RNA polymerase II transcription factor activity, sequence-specific DNA binding|RNA polymerase II transcription factor activity, sequence-specific DNA binding|enzyme binding|his…	B-1 B cell homeostasis|angiogenesis|axonal transport of mitochondrion|blood vessel development|blood vessel morphogenesis|camera-type eye morphogenesis|cardiac ventricle morphogenesis|cartilage development|cell differentiation|cell differentiation|cellular iron ion homeostasis|cellular response to hypoxia|cellular response to hypoxia|cerebral cortex development|collagen metabolic process|connecti…	RNA polymerase II transcription factor complex|cytoplasm|cytosol|motile cilium|nuclear body|nuclear speck|nucleoplasm|nucleus|nucleus|nucleus|protein-containing complex|transcription factor complex
Ifng	GEA00002673	Ifng_2673_i0	GGCACAGTCATTGAAAGCCTA	GCCAGTTCCTCCAGATATCCA	NM_008337.3	NM_008337.3	Ifg|IFN-g	interferon gamma	cytokine activity|cytokine activity|interferon-gamma receptor binding|protein binding	CD8-positive, alpha-beta T cell differentiation involved in immune response|T cell receptor signaling pathway|adaptive immune response|adaptive immune response|antigen processing and presentation|apoptotic process|cell cycle arrest|cellular response to interleukin-18|cellular response to lipopolysaccharide|defense response to bacterium|defense response to protozoan|defense response to protozoan|d…	cytoplasm|external side of plasma membrane|extracellular region|extracellular space|extracellular space|extracellular space|neuron projection|perikaryon
Il10	GEA00002698	Il10_2698_i1	AAAGGACCAGCTGGACAACA	TAAGGCTTGGCAACCCAAGTA	NM_010548.2	NM_010548.2	CSIF|Il-10	interleukin 10	cytokine activity|cytokine activity|interleukin-10 receptor binding|interleukin-10 receptor binding	branching involved in labyrinthine layer morphogenesis|cellular response to hepatocyte growth factor stimulus|cellular response to lipopolysaccharide|defense response to bacterium|defense response to protozoan|immune response|immune response|inflammatory response|negative regulation of B cell proliferation|negative regulation of apoptotic process|negative regulation of cell proliferation|negative…	extracellular region|extracellular space|extracellular space
Il12b	GEA00002723	Il12b_2723_i1	ATCGTTTTGCTGGTGTCTCC	GGAGTCCAGTCCACCTCTAC	NM_008352.2	NM_008352.2	p40|Il-12b|Il12p40|Il-12p40	interleukin 12b	cytokine activity|cytokine activity|cytokine receptor activity|cytokine receptor binding|growth factor activity|growth factor activity|identical protein binding|interleukin-12 alpha subunit binding|interleukin-12 alpha subunit binding|interleukin-12 alpha subunit binding|interleukin-12 receptor binding|interleukin-23 receptor binding|interleukin-23 receptor binding|protein binding|protein heterod…	T-helper 1 cell cytokine production|T-helper cell differentiation|cell cycle arrest|cell migration|cell proliferation|cell proliferation|cell surface receptor signaling pathway|cellular response to interferon-gamma|cellular response to lipopolysaccharide|defense response to Gram-negative bacterium|defense response to protozoan|defense response to protozoan|defense response to protozoan|defense re…	cytoplasm|extracellular region|extracellular space|extracellular space|interleukin-12 complex|interleukin-12 complex|interleukin-12 complex|interleukin-12 complex|interleukin-23 complex|interleukin-23 complex|interleukin-23 complex|membrane
Il1a	GEA00002836	Il1a_2836_i1	AGATGGCCAAAGTTCCTGAC	AGAGATGGTCAATGGCAGAAC	NM_010554.4	NM_010554.4	Il-1a	interleukin 1 alpha	copper ion binding|cytokine activity|cytokine activity|interleukin-1 receptor binding	cellular response to heat|connective tissue replacement involved in inflammatory response wound healing|cytokine-mediated signaling pathway|ectopic germ cell programmed cell death|extrinsic apoptotic signaling pathway in absence of ligand|fever generation|immune response|inflammatory response|interleukin-1-mediated signaling pathway|keratinization|negative regulation of cell proliferation|negativ…	cell surface|cytoplasm|cytosol|extracellular region|extracellular space|extracellular space|plasma membrane
Il1r1	GEA00022685	Il1r1_22685_i8	TCCTGCTCTGGTTTTCTTCC	TCCCAGGGTCTTGGGATAAA	NM_008362.2	NM_001123382.1|NM_008362.2	IL-iR|CD121a|CD121b|IL-1R1|Il1r-1	interleukin 1 receptor, type I	interleukin-1 binding|interleukin-1 receptor activity|interleukin-1 receptor activity|interleukin-1 receptor activity|interleukin-1, Type I, activating receptor activity|ionotropic glutamate receptor binding|platelet-derived growth factor receptor binding|protease binding|protein binding|signal transducer activity	cytokine-mediated signaling pathway|heat acclimation|interleukin-1-mediated signaling pathway|positive regulation of interleukin-1-mediated signaling pathway|positive regulation of neuron migration|positive regulation of neutrophil extravasation|regulation of inflammatory response|response to interleukin-1|response to radiation|signal transduction	axon|cell surface|cell surface|external side of plasma membrane|extracellular region|extracellular space|integral component of membrane|membrane|nucleus|plasma membrane|postsynaptic density|protein-containing complex
Il4ra	GEA00045406	Il4ra_45406_i5	AACATCTCCAGAGAGGACAACC	CTCAGCCTGGGTTCCTTGTA	NM_001008700.3	NM_001008700.3	Il4r|CD124	interleukin 4 receptor, alpha	cytokine receptor activity|protein binding	defense response to protozoan|immune system process|immunoglobulin mediated immune response|negative regulation of T-helper 1 cell differentiation|positive regulation of T-helper 2 cell differentiation|positive regulation of chemokine secretion|positive regulation of immunoglobulin production|positive regulation of macrophage activation|positive regulation of mast cell degranulation|positive regu…	extracellular region|extracellular space|integral component of membrane|membrane|plasma membrane|receptor complex
Il6	GEA00003392	Il6_3392_i0	CCAGAAACCGCTATGAAGTTCC	GTTGTCACCAGCATCAGTCC	NM_031168.1	NM_031168.1	Il-6	interleukin 6	cytokine activity|cytokine activity|growth factor activity|interleukin-6 receptor binding|interleukin-6 receptor binding|interleukin-6 receptor binding|protein binding|signaling receptor binding	T cell activation|T-helper 17 cell lineage commitment|acute-phase response|branching involved in salivary gland morphogenesis|branching involved in salivary gland morphogenesis|cell redox homeostasis|cellular response to hepatocyte growth factor stimulus|cellular response to hydrogen peroxide|cellular response to interleukin-1|cellular response to lipopolysaccharide|cellular response to lipopolys…	cytoplasm|external side of plasma membrane|extracellular region|extracellular space|extracellular space|interleukin-6 receptor complex
Irf4	GEA00013411	Irf4_13411_i5	TCCCCATTGAGCCAAGCATA	CGAGGATGTCCCGGTAATACA	NM_013674.1	NM_013674.1	Spip|IRF-4|LSIRF|AI385587	interferon regulatory factor 4	DNA binding|RNA polymerase II core promoter proximal region sequence-specific DNA binding|protein binding|protein-lysine N-methyltransferase activity|regulatory region DNA binding|sequence-specific DNA binding|transcription factor activity, sequence-specific DNA binding|transcriptional activator activity, RNA polymerase II core promoter proximal region sequence-specific binding	T-helper 17 cell lineage commitment|defense response to protozoan|histone H3 acetylation|histone H4 acetylation|myeloid dendritic cell differentiation|negative regulation of toll-like receptor signaling pathway|positive regulation of DNA binding|positive regulation of interleukin-10 biosynthetic process|positive regulation of interleukin-13 biosynthetic process|positive regulation of interleukin-…	cytoplasm|membrane|nuclear nucleosome|nucleoplasm|nucleus
IRF5	GEP00089493	IRF5_89493_i7	TGATGTCAAACCCCGAGAGAA	GAACATCTCCAGCAGCAACC	NM_001252382.N	NM_001311083|NM_001252382|NM_012057	mirf5|AW491843	interferon regulatory factor 5	DNA binding|DNA binding transcription factor activity|identical protein binding|protein binding|sequence-specific DNA binding|transcription regulatory region DNA binding	cytokine-mediated signaling pathway|defense response to virus|immune system process|innate immune response|positive regulation of apoptotic process|positive regulation of transcription by RNA polymerase II|regulation of transcription by RNA polymerase II|regulation of transcription, DNA-templated|response to muramyl dipeptide|response to peptidoglycan|transcription, DNA-templated	cytoplasm|nucleus
KDM6B	GEP00089471	KDM6B_89471_i12	GAACCCCATCACCGTCATCA	GTCTTGGTGGAGAAAAGGCCTA	NM_001017426.N	NM_001017426	Jmjd3|BC038313|mKIAA0346|1700064E03Rik	KDM1 lysine (K)-specific demethylase 6B	RNA polymerase II proximal promoter sequence-specific DNA binding|beta-catenin binding|chromatin DNA binding|chromatin binding|chromatin binding|dioxygenase activity|histone demethylase activity (H3-K27 specific)|histone demethylase activity (H3-K27 specific)|histone demethylase activity (H3-K27 specific)|metal ion binding|oxidoreductase activity|protein binding|sequence-specific DNA binding|sequ…	cardiac muscle cell differentiation|cell fate commitment|cellular response to hydrogen peroxide|chromatin organization|chromatin remodeling|endothelial cell differentiation|hippocampus development|histone H3-K27 demethylation|histone H3-K27 demethylation|histone H3-K27 demethylation|histone demethylation|inflammatory response|mesodermal cell differentiation|oxidation-reduction process|positive re…	MLL3/4 complex|nuclear chromatin|nucleus|nucleus|nucleus
LIPA	GEP00089484	LIPA_89484_i7	GCGGGAACTTCTGTGCAAAA	TCACTGCTTCCCCAGTCAAAA	NM_021460.N	NM_001111100|NM_021460	Lal|Lip1|Lip-1|AA960673	lysosomal acid lipase A	hydrolase activity|hydrolase activity, acting on ester bonds|lipase activity|sterol esterase activity	cell morphogenesis|cell proliferation|cytokine production|fatty acid metabolic process|homeostasis of number of cells within a tissue|inflammatory response|lipid catabolic process|lipid metabolic process|lung development|sterol metabolic process|tissue remodeling	fibrillar center|intracellular membrane-bounded organelle|lysosome
MAP1LC3A	GEP00059110	MAP1LC3A_59110_i0	TCCGACCGGCCTTTCAA	ATCTGCTGCACCTCCTTACA	NM_025735.3	NM_025735	LC3|LC3a|1010001H21Rik|4922501H04Rik	microtubule-associated protein 1 light chain 3 alpha	microtubule binding|microtubule binding|phosphatidylethanolamine binding|phospholipid binding|protein binding|ubiquitin protein ligase binding	autophagosome assembly|autophagosome assembly|autophagosome maturation|autophagy|autophagy of mitochondrion|autophagy of mitochondrion|cellular response to nitrogen starvation|cellular response to starvation|macroautophagy	autolysosome|autophagosome|autophagosome|autophagosome membrane|autophagosome membrane|autophagosome membrane|cytoplasm|cytoplasmic vesicle|cytoskeleton|cytosol|cytosol|late endosome|membrane|microtubule|microtubule cytoskeleton|organelle membrane
MAP1LC3B	GEP00089486	MAP1LC3B_89486_e3	ACTGCAAGTCCAATGCTCCA	GCTGTCAGAACCACCCTTACA	NM_026160.N	NM_026160	Atg8|LC3b|Map1lc3|1010001C15Rik	microtubule-associated protein 1 light chain 3 beta	microtubule binding|microtubule binding|protein binding|protein domain specific binding|tubulin binding|ubiquitin protein ligase binding	autophagosome assembly|autophagosome maturation|autophagy|autophagy|autophagy of mitochondrion|autophagy of mitochondrion|cellular response to nitrogen starvation|cellular response to starvation|macroautophagy|positive regulation of mucus secretion|positive regulation of protein binding	autolysosome|autophagosome|autophagosome|autophagosome membrane|autophagosome membrane|axon|axoneme|cytoplasm|cytoplasmic vesicle|cytoskeleton|cytosol|dendrite|intracellular|membrane|microtubule|microtubule associated complex|mitochondrion|neuronal cell body
MBNL3	GEP00089488	MBNL3_89488_i5	AGGCTCTGGCTAACATGCA	ACACAGTGGAAGGTGTAGCA	NM_134163.N	NM_134163|NM_001310515	CHCR|MBLX|MBXL|MBLX39|AI661274|A530038J18Rik|E430034C16Rik	muscleblind like splicing factor 3	RNA binding|metal ion binding	RNA splicing|developmental process|mRNA processing|multicellular organism development|negative regulation of myoblast differentiation|regulation of RNA splicing|regulation of alternative mRNA splicing, via spliceosome	cytoplasm|cytoplasm|nucleoplasm|nucleus|nucleus
MET	GEP00084511	MET_84511_i13	GGCTCTTCCTGTGGATGAGAA	GTACTCTTGCGTCATAGCGAAC	NM_008591.N	NM_008591	HGF|HGFR|Par4|c-Met|AI838057	met proto-oncogene	ATP binding|MAP kinase kinase kinase activity|beta-catenin binding|hepatocyte growth factor-activated receptor activity|hepatocyte growth factor-activated receptor activity|hepatocyte growth factor-activated receptor activity|identical protein binding|kinase activity|mitogen-activated protein kinase kinase binding|nucleotide binding|phosphatidylinositol 3-kinase binding|phospholipase binding|prot…	activation of MAPK activity|adult behavior|brain development|branching morphogenesis of an epithelial tube|cardiac muscle cell development|cardiac muscle contraction|cell differentiation|chemical synaptic transmission|endothelial cell morphogenesis|establishment of skin barrier|excitatory postsynaptic potential|flagellated sperm motility|glucose homeostasis|hepatocyte growth factor receptor signa…	basal plasma membrane|basal plasma membrane|cytoplasm|cytoplasm|dendrite|excitatory synapse|extracellular space|integral component of membrane|integral component of plasma membrane|membrane|neuron projection|neuronal cell body|plasma membrane|postsynaptic density|postsynaptic membrane|receptor complex|sperm flagellum
Mmp9	GEA00012886	Mmp9_12886_i0	TCCCCAAAGACCTGAAAACC	GGGTGTAACCATAGCGGTAC	NM_013599.2	NM_013599.2	Clg4b|Gel B|MMP-9|B/MMP9|AW743869|pro-MMP-9	matrix metallopeptidase 9	endopeptidase activity|fibronectin binding|hydrolase activity|identical protein binding|metal ion binding|metalloendopeptidase activity|metalloendopeptidase activity|metallopeptidase activity|metallopeptidase activity|peptidase activity|peptidase activity|protein-containing complex binding|serine-type endopeptidase activity|zinc ion binding	aging|cellular response to cadmium ion|cellular response to cell-matrix adhesion|cellular response to reactive oxygen species|collagen catabolic process|collagen catabolic process|embryo implantation|extracellular matrix organization|extracellular matrix organization|heart development|leukocyte migration|negative regulation of apoptotic process|negative regulation of cation channel activity|negat…	extracellular matrix|extracellular region|extracellular space|protein-containing complex|proteinaceous extracellular matrix
MRC1	GEA00049998	MRC1_49998_i21	AAGGCTATCCTGGTGGAAGAA	CTCTCGTGAATTGCCACCAA	NM_008625.2	NM_008625.2	MR|CD206|AW259686	mannose receptor, C type 1	carbohydrate binding|mannose binding|signaling receptor activity|transmembrane signaling receptor activity|transmembrane signaling receptor activity	cellular response to interferon-gamma|cellular response to interleukin-4|cellular response to lipopolysaccharide|endocytosis|receptor-mediated endocytosis	cell surface|endosome|endosome membrane|integral component of membrane|membrane|plasma membrane
MTOR	GEP00083844	MTOR_83844_i14	AACCCGGGCGTGATCAATAA	ACCCACTTCCGCATTTCCA	NM_020009.N	NM_020009	FRAP|flat|FRAP2|Frap1|RAFT1|RAPT1|AI327068|2610315D21Rik	mechanistic target of rapamycin kinase	ATP binding|RNA polymerase III type 1 promoter DNA binding|RNA polymerase III type 2 promoter DNA binding|RNA polymerase III type 3 promoter DNA binding|TFIIIC-class transcription factor binding|identical protein binding|kinase activity|kinase activity|nucleotide binding|phosphoprotein binding|protein binding|protein domain specific binding|protein kinase activity|protein kinase binding|protein s…	de novo' pyrimidine nucleobase biosynthetic process|DNA repair|T-helper 1 cell lineage commitment|TOR signaling|TOR signaling|TORC1 signaling|cardiac cell development|cardiac muscle cell development|cardiac muscle contraction|cardiac muscle tissue development|cell projection organization|cell projection organization|cellular response to amino acid starvation|cellular response to amino acid stimul…	Golgi apparatus|PML body|TORC1 complex|TORC1 complex|TORC2 complex|cytoplasm|cytosol|cytosol|dendrite|dendrite|endomembrane system|endoplasmic reticulum|lysosome|membrane|mitochondrial outer membrane|mitochondrion|neuronal cell body|nucleus|nucleus|nucleus|protein-containing complex
Myc	GEA00011771	Myc_11771_i1	AGTGCTGCATGAGGAGACA	TCTCCACAGACACCACATCAA	NM_010849.4	NM_001177354.1|NM_001177353.1|NM_001177352.1|NM_010849.4	Myc2|Nird|Niard|bHLHe39|AU016757	myelocytomatosis oncogene	DNA binding|DNA binding|DNA binding transcription factor activity|E-box binding|RNA polymerase II proximal promoter sequence-specific DNA binding|RNA polymerase II proximal promoter sequence-specific DNA binding|RNA polymerase II transcription factor activity, sequence-specific DNA binding|activating transcription factor binding|double-stranded DNA binding|eukaryotic initiation factor eIF2 bindin…	B cell apoptotic process|DNA-templated transcription, initiation|ERK1 and ERK2 cascade|MAPK cascade|Wnt signaling pathway|activation of cysteine-type endopeptidase activity involved in apoptotic process|amino acid transport|branching involved in ureteric bud morphogenesis|canonical Wnt signaling pathway|canonical Wnt signaling pathway involved in negative regulation of apoptotic process|canonical…	axon|cytoplasm|nuclear body|nuclear chromatin|nuclear envelope|nuclear euchromatin|nucleolus|nucleoplasm|nucleoplasmic reticulum|nucleus|nucleus|perinuclear region of cytoplasm|protein-containing complex|rough endoplasmic reticulum|spindle
Myd88	GEA00040896	Myd88_40896_i0	GCCTTGTTAGACCGTGAGGATA	TCCTGGTTCTGCTGCTTACC	NM_010851.2	NM_010851.2		myeloid differentiation primary response gene 88	TIR domain binding|Toll binding|identical protein binding|interleukin-1 receptor binding|protein binding|protein self-association|receptor binding	3'-UTR-mediated mRNA stabilization|JNK cascade|MyD88-dependent toll-like receptor signaling pathway|MyD88-dependent toll-like receptor signaling pathway|Toll signaling pathway|apoptotic process|cell surface receptor signaling pathway|cytokine-mediated signaling pathway|defense response to Gram-positive bacterium|establishment of endothelial intestinal barrier|immune response|immune system process…	cytoplasm|cytoplasm|cytosol|nucleus|plasma membrane|postsynaptic density|protein complex
NFKB1	GEA00013174	NFKB1_13174_i21	ACCGTATGAGCCTGTGTTCA	GTAGCCTCGTGTCTTCTGTCA	NM_008689.2	NM_008689.2	p50|p105|NF-KB1|p50/p105|NF-kappaB|NF-kappaB1	nuclear factor of kappa light polypeptide gene enhancer in B cells 1, p105	DNA binding|DNA binding|DNA binding transcription factor activity|RNA polymerase II distal enhancer sequence-specific DNA binding|RNA polymerase II regulatory region sequence-specific DNA binding|actinin binding|chromatin binding|double-stranded DNA binding|heat shock protein binding|identical protein binding|protein binding|protein heterodimerization activity|protein homodimerization activity|pr…	apoptotic process|cellular response to angiotensin|cellular response to brain-derived neurotrophic factor stimulus|cellular response to carbohydrate stimulus|cellular response to cytokine stimulus|cellular response to diterpene|cellular response to dsRNA|cellular response to glucoside|cellular response to interleukin-1|cellular response to interleukin-6|cellular response to lipopolysaccharide|cel…	cytoplasm|cytoplasm|cytosol|cytosol|mitochondrion|neuron projection|nucleoplasm|nucleus|nucleus|protein-containing complex
Nos2	GEA00013195	Nos2_13195_i25	GAGGAGCAGGTGGAAGACTA	GGAAAAGACTGCACCGAAGATA	NM_010927.3	NM_010927.3	iNOS|Nos-2|Nos2a|i-NOS|NOS-II|MAC-NOS	nitric oxide synthase 2, inducible	FMN binding|FMN binding|Hsp90 protein binding|NADP binding|NADPH-hemoprotein reductase activity|actin binding|arginine binding|beta-catenin binding|cAMP-dependent protein kinase regulator activity|cadherin binding|calmodulin binding|flavin adenine dinucleotide binding|flavin adenine dinucleotide binding|heme binding|iron ion binding|metal ion binding|nitric-oxide synthase activity|nitric-oxide sy…	arginine catabolic process|arginine catabolic process|arginine catabolic process|cellular response to cytokine stimulus|cellular response to drug|cellular response to interferon-gamma|cellular response to lipopolysaccharide|cellular response to organic cyclic compound|circadian rhythm|defense response to bacterium|defense response to bacterium|defense response to bacterium|inflammatory response|i…	cortical cytoskeleton|cytoplasm|cytoplasm|cytosol|cytosol|cytosol|extracellular space|intracellular|nucleus|nucleus|perinuclear region of cytoplasm|perinuclear region of cytoplasm|peroxisome|plasma membrane|vesicle membrane|vesicle membrane
Nrp1	GEA00031937	Nrp1_31937_i7	CCTGTATCCTGGGAAACTGGTA	GCCCAACATTCCAGAGCAA	NM_008737.2	NM_008737.2		neuropilin 1
NRP2.1	GEP00089443	Nrp2_89443_e15	CAAAACCTCCCACTACACCAAC	CCCGCTCTTGCTCTAGCTTA	NM_001077407.	NM_001077406|NM_001077407	Np2|Np-2|Npn2|Npn-2|1110048P06Rik	neuropilin 2	heparin binding|identical protein binding|metal ion binding|protein binding|semaphorin receptor activity|vascular endothelial growth factor-activated receptor activity	angiogenesis|axon extension involved in axon guidance|axon guidance|cell differentiation|cellular response to leukemia inhibitory factor|dorsal root ganglion morphogenesis|facial nerve structural organization|facioacoustic ganglion development|gonadotrophin-releasing hormone neuronal migration to the hypothalamus|heart development|multicellular organism development|negative chemotaxis|negative ch…	axon|integral component of membrane|membrane|plasma membrane
NRP2.2	GEP00089444	Nrp2_89444_e16	ACCCCTCATCTGGCAAAGAAA	TGGCGATGATGGTGATCAGAA	NM_001077403.	NM_010939|NM_001077403|NM_001077405|NM_001077404	Np2|Np-2|Npn2|Npn-2|1110048P06Rik	neuropilin 2	heparin binding|identical protein binding|metal ion binding|protein binding|semaphorin receptor activity|vascular endothelial growth factor-activated receptor activity	angiogenesis|axon extension involved in axon guidance|axon guidance|cell differentiation|cellular response to leukemia inhibitory factor|dorsal root ganglion morphogenesis|facial nerve structural organization|facioacoustic ganglion development|gonadotrophin-releasing hormone neuronal migration to the hypothalamus|heart development|multicellular organism development|negative chemotaxis|negative ch…	axon|integral component of membrane|membrane|plasma membrane
NRP2.3	GEP00089445	Nrp2_89445_e15	TCACCTACAAAACCTCCCACTAC	CCCGCTCTTGCTCTAGCTTA	NM_001077407.	NM_001077406|NM_001077407	Np2|Np-2|Npn2|Npn-2|1110048P06Rik	neuropilin 2	heparin binding|identical protein binding|metal ion binding|protein binding|semaphorin receptor activity|vascular endothelial growth factor-activated receptor activity	angiogenesis|axon extension involved in axon guidance|axon guidance|cell differentiation|cellular response to leukemia inhibitory factor|dorsal root ganglion morphogenesis|facial nerve structural organization|facioacoustic ganglion development|gonadotrophin-releasing hormone neuronal migration to the hypothalamus|heart development|multicellular organism development|negative chemotaxis|negative ch…	axon|integral component of membrane|membrane|plasma membrane
NRP2.4	GEP00089446	Nrp2_89446_e16	CCTTTACTGCACCTGCTCCTA	AGGCCATCGTAGAGCTCAAA	NM_001077403.	NM_010939|NM_001077403|NM_001077405|NM_001077404	Np2|Np-2|Npn2|Npn-2|1110048P06Rik	neuropilin 2	heparin binding|identical protein binding|metal ion binding|protein binding|semaphorin receptor activity|vascular endothelial growth factor-activated receptor activity	angiogenesis|axon extension involved in axon guidance|axon guidance|cell differentiation|cellular response to leukemia inhibitory factor|dorsal root ganglion morphogenesis|facial nerve structural organization|facioacoustic ganglion development|gonadotrophin-releasing hormone neuronal migration to the hypothalamus|heart development|multicellular organism development|negative chemotaxis|negative ch…	axon|integral component of membrane|membrane|plasma membrane
OLR1	GEP00089478	OLR1_89478_i6	CCAACCATGGCTATGGGAGAA	AAAGAAACGCCCCTGGTCTTA	NM_138648.N	NM_001301094|NM_138648|NM_001301096	LOX-1|SR-EI|Scare1	oxidized low density lipoprotein (lectin-like) receptor 1	carbohydrate binding|identical protein binding|low-density lipoprotein particle receptor activity	cell adhesion|cell death|immune system process|inflammatory response|leukocyte cell-cell adhesion|lipoprotein metabolic process|negative regulation of gene expression	extracellular region|extrinsic component of plasma membrane|integral component of membrane|intracellular membrane-bounded organelle|membrane|nucleoplasm|plasma membrane|receptor complex
PDCD1LG2	GEP00080861	PDCD1LG2_80861_i3	GCATGTTCTGGAATGCTCACA	TTCTGGGGACTTTGGGTTCC	NM_021396.N	NM_021396	Btdc|B7-DC|PD-L2|F730015O22Rik	programmed cell death 1 ligand 2	protein binding	T cell costimulation|cell surface receptor signaling pathway|cellular response to lipopolysaccharide|immune response|negative regulation of T cell proliferation|negative regulation of T cell proliferation|negative regulation of activated T cell proliferation|negative regulation of interferon-gamma production|negative regulation of interleukin-10 production|positive regulation of T cell proliferat…	cell surface|external side of plasma membrane|integral component of membrane|membrane|plasma membrane
PDGFB	GEP00056735	PDGFB_56735_i4	CGGCCTGTGACTAGAAGTCC	TCACCGTCCGAATGGTCAC	NM_011057.3	NM_011057	Sis|PDGF-B	platelet derived growth factor, B polypeptide	chemoattractant activity|collagen binding|growth factor activity|growth factor receptor binding|identical protein binding|platelet-derived growth factor binding|platelet-derived growth factor receptor binding|platelet-derived growth factor receptor binding|protein heterodimerization activity|protein homodimerization activity|signaling receptor binding|superoxide-generating NADPH oxidase activator…	actin cytoskeleton organization|actin cytoskeleton organization|activation of protein kinase B activity|activation of protein kinase activity|blood vessel development|blood vessel morphogenesis|blood vessel morphogenesis|branching involved in salivary gland morphogenesis|cardiac vascular smooth muscle cell differentiation|cell chemotaxis|cell projection assembly|cellular response to growth factor…	basolateral plasma membrane|cell surface|cytoplasm|dendrite|extracellular region|extracellular space|extracellular space|membrane|neuronal cell body
PLXNA1	GEP00083810	PLXNA1_83810_i8	CTTTCTGGAAGGCCGAGTCA	CACTGGCACATAGATGTGGGTA	NM_008881.N	NM_008881	NOV|Plxn1|PlexA1|mKIAA4053|2600013D04Rik	plexin A1	protein binding|semaphorin receptor activity|semaphorin receptor activity	dichotomous subdivision of terminal units involved in salivary gland branching|negative regulation of cell adhesion|neuron projection extension|neuron projection guidance|positive regulation of axonogenesis|regulation of GTPase activity|regulation of cell migration|regulation of cell shape|regulation of smooth muscle cell migration|semaphorin-plexin signaling pathway|semaphorin-plexin signaling p…	integral component of membrane|integral component of plasma membrane|membrane|plasma membrane|semaphorin receptor complex
PLXNA2	GEP00083803	PLXNA2_83803_i25	ACTGGAAGCGGCTTAACACA	AGGAGGTCTGCTTAGGAACCA	NM_008882.N	NM_008882	OCT|Plxn2|PlexA2|AA589422|AW457381|mKIAA0463|2810428A13Rik	plexin A2	identical protein binding|protein binding|semaphorin receptor activity|semaphorin receptor activity|semaphorin receptor activity|semaphorin receptor activity	cell surface receptor signaling pathway|centrosome localization|cerebellar granule cell precursor tangential migration|limb bud formation|negative regulation of cell adhesion|neural tube development|pharyngeal system development|positive regulation of axonogenesis|regulation of GTPase activity|regulation of cell migration|regulation of cell migration|regulation of cell shape|semaphorin-plexin sig…	integral component of membrane|integral component of plasma membrane|integral component of plasma membrane|membrane|plasma membrane|semaphorin receptor complex
Plxna4	GEP00083797	Plxna4_83797_i25	ACTCAACACAGTAGCCCACTA	ACTGCATTGTAGGCTGTCAC	NM_175750.N	NM_175750	Plxa4|mKIAA1550|9330117B14	plexin A4	protein binding|semaphorin receptor activity|semaphorin receptor activity	anterior commissure morphogenesis|axon guidance|branchiomotor neuron axon guidance|chemorepulsion of branchiomotor axon|cranial nerve morphogenesis|facial nerve morphogenesis|facial nerve structural organization|glossopharyngeal nerve morphogenesis|motor neuron axon guidance|negative regulation of cell adhesion|nervous system development|neuron projection morphogenesis|positive regulation of axon…	integral component of membrane|integral component of plasma membrane|membrane|plasma membrane|semaphorin receptor complex
PLXNB2	GEP00083809	PLXNB2_83809_i11	ATCCCCATGAACCATGAGACA	TGCCCACATACAGGGAAGAA	NM_001159521.N	NM_001159521|NM_138749|NM_001284506	Debt|plexin-B2	plexin B2	protein binding|semaphorin receptor activity|semaphorin receptor activity	brain development|homophilic cell adhesion via plasma membrane adhesion molecules|multicellular organism development|negative regulation of cell adhesion|neural tube closure|neuroblast proliferation|positive regulation of axonogenesis|positive regulation of axonogenesis|positive regulation of neuron projection development|regulation of GTPase activity|regulation of GTPase activity|regulation of c…	integral component of membrane|integral component of plasma membrane|integral component of plasma membrane|membrane|plasma membrane|semaphorin receptor complex
PLXND1	GEP00089470	PLXND1_89470_i26	CTTCTGCAAGAACGTCCCCTA	TCTGGGTACTCGAGGCAAAC	NM_026376.N	NM_026376	b2b553Clo|b2b1863Clo|6230425C21Rik	plexin D1	protein binding|protein domain specific binding|semaphorin receptor activity|semaphorin receptor activity|semaphorin receptor activity	angiogenesis|aorta development|branching involved in blood vessel morphogenesis|cardiac septum development|coronary vasculature development|dichotomous subdivision of terminal units involved in salivary gland branching|endothelial cell migration|endothelial cell migration|multicellular organism development|negative regulation of cell adhesion|outflow tract morphogenesis|outflow tract morphogenesi…	cell projection|integral component of membrane|integral component of plasma membrane|integral component of plasma membrane|lamellipodium|membrane|plasma membrane|semaphorin receptor complex
PPARD	GEP00083039	PPARD_83039_i4	ACCGCAACAAGTGTCAGTAC	TCCGGCATCCGTCCAAA	NM_011145.N	NM_011145	NUC1|NUC-1|Nr1c2|Pparb|PPAR[b]|Pparb/d|PPAR-beta|PPARdelta|PPAR-delta	peroxisome proliferator activator receptor delta	DNA binding|DNA binding transcription factor activity|DNA binding transcription factor activity|NF-kappaB binding|RNA polymerase II regulatory region sequence-specific DNA binding|drug binding|enzyme activator activity|fatty acid binding|ligand-dependent nuclear receptor transcription coactivator activity|linoleic acid binding|lipid binding|metal ion binding|nuclear receptor activity|nuclear rece…	adipose tissue development|apoptotic process|apoptotic signaling pathway|axon ensheathment|cell differentiation|cell differentiation|cell differentiation|cell proliferation|cell-substrate adhesion|cellular process|cellular response to hypoxia|cellular response to lipopolysaccharide|embryo implantation|embryo implantation|epidermis development|fatty acid beta-oxidation|fatty acid oxidation|fatty a…	RNA polymerase II transcription factor complex|nuclear chromatin|nucleus|nucleus|nucleus
Pparg	GEA00011774	Pparg_11774_i1	ACCCAATGGTTGCTGATTACA	AGGTGGAGATGCAGGTTCTA	NM_011146.3	NM_001127330.1|NM_011146.3	Nr1c3|PPARgamma|PPAR-gamma|PPARgamma2|PPAR-gamma2	peroxisome proliferator activated receptor gamma	DBD domain binding|DNA binding|DNA binding|DNA binding|DNA binding transcription factor activity|DNA binding transcription factor activity|LBD domain binding|RNA polymerase II regulatory region DNA binding|WW domain binding|activating transcription factor binding|alpha-actinin binding|arachidonic acid binding|chromatin binding|core promoter sequence-specific DNA binding|double-stranded DNA bindin…	activation of cysteine-type endopeptidase activity involved in apoptotic process|brown fat cell differentiation|cell fate commitment|cell fate commitment|cell maturation|cellular response to insulin stimulus|cellular response to insulin stimulus|cellular response to lithium ion|cellular response to low-density lipoprotein particle stimulus|cellular response to organic cyclic compound|diet induced…	RNA polymerase II transcription factor complex|cytoplasm|cytosol|cytosol|intracellular membrane-bounded organelle|nucleus|nucleus|perinuclear region of cytoplasm|protein complex
PRG4	GEP00089472	PRG4_89472_i2	TGGAGTGCTGTCCTGATTTCA	CTCGAGCGAAGGACTCGAA	NM_021400.	NM_001110146|NM_021400	MSF|SZP|CACP|JCAP|DOL54|lubricin	proteoglycan 4 (megakaryocyte stimulating factor, articular superficial zone protein)	polysaccharide binding|scavenger receptor activity	hematopoietic stem cell proliferation|immune response|negative regulation of interleukin-6 biosynthetic process|regulation of cell proliferation	extracellular region|extracellular space|extracellular space
PRKACA	GEP00089473	PRKACA_89473_i2	AGCACAAGGAGAGTGGGAAC	GCTCGATCTGCTTTAGCTTCAC	NM_008854.N	NM_001277898|NM_008854	PKCD|Pkaca	protein kinase, cAMP dependent, catalytic, alpha	ATP binding|ATP binding|Rab GTPase binding|cAMP-dependent protein kinase activity|cAMP-dependent protein kinase activity|kinase activity|magnesium ion binding|manganese ion binding|nucleotide binding|protein binding|protein domain specific binding|protein kinase A regulatory subunit binding|protein kinase A regulatory subunit binding|protein kinase activity|protein kinase activity|protein kinase …	cellular response to glucose stimulus|cellular response to heat|cellular response to parathyroid hormone stimulus|mRNA processing|mesoderm formation|modulation of chemical synaptic transmission|negative regulation of meiotic cell cycle|negative regulation of smoothened signaling pathway involved in dorsal/ventral neural tube patterning|neural tube closure|peptidyl-serine phosphorylation|peptidyl-…	Golgi apparatus|acrosomal vesicle|axoneme|cAMP-dependent protein kinase complex|cAMP-dependent protein kinase complex|cell projection|centrosome|ciliary base|cilium|cytoplasm|cytoplasm|cytoplasmic vesicle|cytosol|dendritic spine|intercellular bridge|membrane|membrane|mitochondrion|motile cilium|neuromuscular junction|neuron projection|nuclear speck|nucleotide-activated protein kinase complex|nucl…
Pten	GEA00011776	Pten_11776_i3	GAGACATTATGACACCGCCAAA	AAGTTCTAGCTGTGGTGGGTTA	NM_008960.2	NM_008960.2	TEP1|MMAC1|AI463227|2310035O07Rik|A130070J02Rik|B430203M17Rik	phosphatase and tensin homolog	PDZ domain binding|anaphase-promoting complex binding|enzyme binding|hydrolase activity|identical protein binding|inositol-1,3,4,5-tetrakisphosphate 3-phosphatase activity|magnesium ion binding|phosphatase activity|phosphatidylinositol-3,4,5-trisphosphate 3-phosphatase activity|phosphatidylinositol-3,4,5-trisphosphate 3-phosphatase activity|phosphatidylinositol-3,4-bisphosphate 3-phosphatase acti…	adult behavior|angiogenesis|apoptotic process|brain morphogenesis|canonical Wnt signaling pathway|cardiac muscle tissue development|cell migration|cellular response to decreased oxygen levels|cellular response to hypoxia|central nervous system development|central nervous system myelin maintenance|central nervous system neuron axonogenesis|dendritic spine morphogenesis|dentate gyrus development|de…	Schmidt-Lanterman incisure|apical plasma membrane|cell projection|cytoplasm|cytoplasm|cytoplasmic side of plasma membrane|cytosol|dendritic spine|mitochondrion|myelin sheath adaxonal region|neuron projection|neuron projection|neuron projection|nucleoplasm|nucleus|nucleus|plasma membrane|postsynaptic membrane
RAC2	GEP00089475	RAC2_89475_i4	AAGCTGGCTCCCATCACCTA	TGGGTGAGTGCAGAACATTCC	NM_009008.N	NM_009008	AI323801|AI452260	Rac family small GTPase 2	GTP binding|GTP binding|GTPase activity|GTPase activity|nucleotide binding|protein kinase binding|protein kinase regulator activity	G-protein coupled receptor signaling pathway|Rac protein signal transduction|Rho protein signal transduction|actin cytoskeleton organization|actin cytoskeleton organization|actin cytoskeleton organization|actin cytoskeleton reorganization|actin filament organization|actin filament organization|bone resorption|cell migration|cell morphogenesis|cell projection assembly|cell projection assembly|chem…	actin filament|cytoplasm|cytoplasm|cytoskeleton|cytosol|intracellular|lamellipodium|membrane|nuclear envelope|plasma membrane
Rarb	GEA00013197	Rarb_13197_i6	ACAGATCTCCGCAGCATCA	AGGTGGCATTGATCCAGGAA	NM_011243.1	NM_011243.1	Hap|Nr1b2|A830025K23	retinoic acid receptor, beta	DNA binding|RNA polymerase II regulatory region sequence-specific DNA binding|drug binding|metal ion binding|protein complex binding|retinoic acid receptor activity|retinoid X receptor binding|sequence-specific DNA binding|steroid hormone receptor activity|transcription factor activity, sequence-specific DNA binding|zinc ion binding	bone development|embryonic digestive tract development|embryonic eye morphogenesis|embryonic hindlimb morphogenesis|glandular epithelial cell development|growth plate cartilage development|multicellular organism growth|negative regulation of apoptotic process|negative regulation of cartilage development|negative regulation of cell proliferation|negative regulation of chondrocyte differentiation|n…	nucleoplasm|nucleus
RETNLA	GEP00086600	RETNLA_86600_i2	ATCCCTCCACTGTAACGAAGAC	ACAAGCACACCCAGTAGCA	NM_020509.N	NM_020509	HIMF|Xcp2|Fizz1|RELMa|Fizz-1|RELMalpha|RELM-alpha|1810019L16Rik	resistin like alpha			extracellular region|extracellular space
RUBCN	GEP00089481	RUBCN_89481_i1	TCCTGTATCATGGGCTCATCC	GCCACCGAATGTCTTTCACA	NM_001200038.N	NM_172615|NM_001200038	Rubicon|mKIAA0226|5330403K09|1700021K19Rik	RUN domain and cysteine-rich domain containing, Beclin 1-interacting protein	protein binding	autophagy|endocytosis|immune system process|negative regulation of autophagosome maturation|negative regulation of autophagy|negative regulation of endocytosis|negative regulation of phosphatidylinositol 3-kinase activity	cytosol|early endosome|endosome|intracellular membrane-bounded organelle|late endosome|lysosome|nucleoplasm
Sema3a	GEA00011851	Sema3a_11851_i6	AGACGGAGAACACTCTGGAA	CTTCTGTGTCCACCAAAGTCA	NM_009152.3	NM_009152.3		sema domain, immunoglobulin domain (Ig), short basic domain, secreted, (semaphorin) 3A
SEMA3E	GEP00089489	SEMA3E_89489_i8	GCCGACCAGAGATCCTAAGAA	ACACATACAGCATGGCCTCTA	NM_011348.N	NM_011348	Semah|AA408817|mKIAA0331|6430702L12	sema domain, immunoglobulin domain (Ig), short basic domain, secreted, (semaphorin) 3E	chemorepellent activity|neuropilin binding|protein binding|semaphorin receptor binding|semaphorin receptor binding	angiogenesis|branching involved in blood vessel morphogenesis|cell differentiation|multicellular organism development|negative chemotaxis|negative regulation of angiogenesis|negative regulation of axon extension involved in axon guidance|negative regulation of cell-matrix adhesion|nervous system development|neural crest cell migration|positive regulation of cell migration|regulation of actin cyto…	extracellular region|extracellular space|extracellular space
SEMA3F	GEP00083799	SEMA3F_83799_i4	ACAACCCCATGTGCACCTA	CTCCAGTTTCTCAGGCTCCA	NM_011349.N	NM_011349	Sema4|Semak	sema domain, immunoglobulin domain (Ig), short basic domain, secreted, (semaphorin) 3F	chemorepellent activity|chemorepellent activity|chemorepellent activity|neuropilin binding|semaphorin receptor binding	axon extension involved in axon guidance|axon guidance|axon guidance|branchiomotor neuron axon guidance|facial nerve structural organization|negative chemotaxis|negative chemotaxis|negative chemotaxis|negative regulation of axon extension involved in axon guidance|negative regulation of axon extension involved in axon guidance|negative regulation of axon extension involved in axon guidance|nerve …	extracellular region|extracellular space|extracellular space
SEMA4A	GEP00083780	SEMA4A_83780_i5	CTTTGACCCTGTTCACAAGCA	CATGGTGCCGGAATAAAGCA	NM_013658.N	NM_013658|NM_001163489|NM_001163491|NM_001163490	SemB|Semab|AI132332	sema domain, immunoglobulin domain (Ig), transmembrane domain (TM) and short cytoplasmic domain, (semaphorin) 4A	chemorepellent activity|neuropilin binding|semaphorin receptor binding	T cell differentiation involved in immune response|T-helper 1 cell differentiation|adaptive immune response|angiogenesis|axonogenesis|cell differentiation|immune system process|multicellular organism development|negative chemotaxis|negative regulation of angiogenesis|negative regulation of axon extension involved in axon guidance|nervous system development|neural crest cell migration|positive reg…	cytosol|extracellular space|integral component of membrane|intracellular membrane-bounded organelle|nucleus|plasma membrane
SEMA4B	GEP00089492	SEMA4B_89492_i2	GAGGCCCTCTTTGCACTTAAC	TGTCAGCATCTGCACTCCA	NM_013659.N	NM_013659	SemC|Semac|mKIAA1745	sema domain, immunoglobulin domain (Ig), transmembrane domain (TM) and short cytoplasmic domain, (semaphorin) 4B	chemorepellent activity|neuropilin binding|protein binding|semaphorin receptor binding	cell differentiation|multicellular organism development|negative chemotaxis|negative regulation of axon extension involved in axon guidance|nervous system development|neural crest cell migration|positive regulation of cell migration|semaphorin-plexin signaling pathway	extracellular space|integral component of membrane|membrane|plasma membrane|plasma membrane|postsynaptic membrane|synapse
Sema4d	GEA00047820	Sema4d_47820_i6	CCCACAGCTACACATCAGTCA	ATGGGTTCACTGCCCAAGAA	NM_013660.3	NM_013660.3		sema domain, immunoglobulin domain (Ig), transmembrane domain (TM) and short cytoplasmic domain, (semaphorin) 4D
SEMA5A	GEP00083785	SEMA5A_83785_i18	AAGAGGCACTCTGCAACACA	TACCAGATGCATCGCACACA	NM_009154.N	NM_009154	semF|Semaf|AI464145|5930434A13|9130201M22Rik	sema domain, seven thrombospondin repeats (type 1 and type 1-like), transmembrane domain (TM) and short cytoplasmic domain, (semaphorin) 5A	axon guidance receptor activity|chondroitin sulfate proteoglycan binding|heparan sulfate proteoglycan binding|semaphorin receptor binding|syndecan binding	axon extension|axon guidance|axonal fasciculation|blood vessel endothelial cell proliferation involved in sprouting angiogenesis|branching involved in blood vessel morphogenesis|branching morphogenesis of an epithelial tube|cell chemotaxis|cell differentiation|detection of light stimulus involved in visual perception|diencephalon development|multicellular organism development|negative regulation …	integral component of membrane|integral component of membrane|membrane
SLC2A1	GEA00044999	SLC2A1_44999_i7	GCTGTGCTGTGCTCATGAC	GATGGCCACGATGCTCAGATA	NM_011400.3	NM_011400.3	Glut1|Glut-1	solute carrier family 2 (facilitated glucose transporter), member 1	D-glucose transmembrane transporter activity|D-glucose transmembrane transporter activity|dehydroascorbic acid transmembrane transporter activity|dehydroascorbic acid transmembrane transporter activity|glucose transmembrane transporter activity|identical protein binding|kinase binding|protein binding|protein self-association|transmembrane transporter activity|transporter activity|xenobiotic trans…	carbohydrate transport|cellular response to glucose starvation|dehydroascorbic acid transport|dehydroascorbic acid transport|glucose transmembrane transport|glucose transmembrane transport|protein-containing complex assembly|transmembrane transport|xenobiotic transport	Z disc|apical plasma membrane|basolateral plasma membrane|caveola|cell-cell junction|cortical actin cytoskeleton|cytoplasm|cytoplasm|cytosol|female pronucleus|integral component of membrane|integral component of plasma membrane|intercalated disc|intracellular|membrane|membrane raft|midbody|plasma membrane|plasma membrane|sarcolemma|sarcolemma|vesicle
SQSTM1	GEP00088222	SQSTM1_88222_i0	GTGGCTGTGCTGTTCCC	TGGAAAAGGCAACCAAGTCC	NM_011018.N	NM_001290769|NM_011018	Osi|p62|A170|STAP|OSF-6|STONE14	sequestosome 1	K63-linked polyubiquitin modification-dependent protein binding|K63-linked polyubiquitin modification-dependent protein binding|SH2 domain binding|enzyme binding|identical protein binding|identical protein binding|identical protein binding|ionotropic glutamate receptor binding|metal ion binding|protein binding|protein homodimerization activity|protein kinase C binding|protein kinase binding|trans…	aggrephagy|apoptotic process|autophagy|cell differentiation|endosome organization|immune system process|macroautophagy|mitophagy|negative regulation of growth of symbiont in host|negative regulation of transcription by RNA polymerase II|positive regulation of long-term synaptic potentiation|positive regulation of protein localization to plasma membrane|positive regulation of protein phosphorylati…	Lewy body|P-body|PML body|aggresome|aggresome|amphisome|autolysosome|autolysosome|autophagosome|autophagosome|autophagosome|cytoplasm|cytoplasmic vesicle|cytosol|endoplasmic reticulum|endosome|inclusion body|intracellular membrane-bounded organelle|lysosome|nucleus|phagophore assembly site|sperm midpiece
Stat1	GEA00003599	Stat1_3599_i9	GCAGGTGTTGTCAGATCGAAC	ATGCACGGCTGTCGTTCTA	NM_009283.3	NM_009283.3	AA408197|2010005J02Rik	signal transducer and activator of transcription 1	CCR5 chemokine receptor binding|DNA binding|DNA binding transcription factor activity|DNA binding transcription factor activity|RNA polymerase II core promoter sequence-specific DNA binding|RNA polymerase II proximal promoter sequence-specific DNA binding|cadherin binding|core promoter binding|double-stranded DNA binding|enzyme binding|histone acetyltransferase binding|histone binding|identical p…	JAK-STAT cascade|activation of cysteine-type endopeptidase activity involved in apoptotic process|blood circulation|cellular response to cytokine stimulus|cellular response to insulin stimulus|cellular response to interferon-beta|cellular response to interferon-gamma|cellular response to lipopolysaccharide|cellular response to organic cyclic compound|cytokine-mediated signaling pathway|defense re…	axon|cytoplasm|cytoplasm|cytosol|dendrite|nuclear chromatin|nucleolus|nucleoplasm|nucleus|nucleus|nucleus|perinuclear region of cytoplasm|protein-containing complex
Stat3	GEA00003674	Stat3_3674_i15	TGGGCATCAATCCTGTGGTA	CCAATTGGCGGCTTAGTGAA	NM_213659.2	NM_213660.2|NM_213659.2|NM_011486.4	Aprf|AW109958|1110034C02Rik	signal transducer and activator of transcription 3	CCR5 chemokine receptor binding|DNA binding|DNA binding|DNA binding transcription factor activity|DNA binding transcription factor activity|RNA polymerase II proximal promoter sequence-specific DNA binding|RNA polymerase II repressing transcription factor binding|RNA polymerase II transcription factor activity, sequence-specific DNA binding|chromatin DNA binding|glucocorticoid receptor binding|id…	JAK-STAT cascade|JAK-STAT cascade involved in growth hormone signaling pathway|JAK-STAT cascade involved in growth hormone signaling pathway|T-helper 17 cell lineage commitment|acute-phase response|astrocyte differentiation|cell proliferation|cellular response to cytokine stimulus|cellular response to hormone stimulus|cellular response to leptin stimulus|cellular response to organic cyclic compou…	RNA polymerase II transcription factor complex|cytoplasm|cytoplasm|cytosol|mitochondrial inner membrane|mitochondrion|nuclear chromatin|nucleoplasm|nucleus|nucleus|plasma membrane
Stat6	GEA00003806	Stat6_3806_i1	TGACTTTCCACAACGCCTAC	CATCTGAACCGACCAGGAAC	NM_009284.2	NM_009284.2		signal transducer and activator of transcription 6
TEK	GEP00089477	TEK_89477_i18	GTTGGATGGCAATCGAATCAC	CCAGAGCAATACACCATAGGAC	NM_013690.N	NM_013690|NM_001290549|NM_001290551	Hyk|STK1|Tie2|Tie-2|Cd202b|AA517024	TEK receptor tyrosine kinase	ATP binding|MAP kinase kinase kinase activity|growth factor binding|kinase activity|mitogen-activated protein kinase kinase binding|nucleotide binding|protein binding|protein kinase activity|protein tyrosine kinase activity|protein tyrosine kinase activity|protein tyrosine kinase activity|signaling receptor activity|transferase activity|transmembrane receptor protein tyrosine kinase activity|tran…	Tie signaling pathway|Tie signaling pathway|angiogenesis|angiogenesis|branching involved in blood vessel morphogenesis|cell differentiation|cell-cell adhesion|cell-matrix adhesion|endothelial cell proliferation|glomerulus vasculature development|heart development|heart trabecula formation|hemopoiesis|intracellular signal transduction|multicellular organism development|negative regulation of angio…	actin filament|apical plasma membrane|basal plasma membrane|basolateral plasma membrane|cell junction|cell surface|cell-cell junction|cytoplasm|cytoplasm|cytoskeleton|extracellular region|integral component of membrane|integral component of plasma membrane|integral component of plasma membrane|membrane|membrane raft|microtubule organizing center|microvillus|perinuclear region of cytoplasm|plasma …
Tgfb1	GEA00003840	Tgfb1_3840_i1	GCTGCGCTTGCAGAGATTAA	GTAACGCCAGGAATTGTTGCTA	NM_011577.1	NM_011577.1	Tgfb|Tgfb-1|TGFbeta1|TGF-beta1	transforming growth factor, beta 1	BMP receptor binding|antigen binding|cytokine activity|enzyme binding|growth factor activity|identical protein binding|protein N-terminus binding|protein binding|protein heterodimerization activity|protein homodimerization activity|protein serine/threonine kinase activator activity|transforming growth factor beta receptor binding|transforming growth factor beta receptor binding|transforming growt…	ATP biosynthetic process|BMP signaling pathway|CD4-positive, CD25-positive, alpha-beta regulatory T cell lineage commitment|MAPK cascade|Notch signaling pathway|SMAD protein complex assembly|SMAD protein signal transduction|T cell activation|T cell activation|T cell differentiation|T cell homeostasis|T-helper 17 cell lineage commitment|adaptive immune response based on somatic recombination of im…	axon|cell surface|cytoplasm|extracellular matrix|extracellular region|extracellular space|extracellular space|extracellular space|microvillus|neuronal cell body|nucleus|proteinaceous extracellular matrix|secretory granule
THBS1	GEA00023044	THBS1_23044_i3	CCCCAGAAGACATTCTCAGGAA	CGTTCACCACGTTGTTGTCA	NM_011580.3	NM_011580.3	TSP1|TSP-1|tbsp1|Thbs-1	thrombospondin 1	calcium ion binding|collagen V binding|extracellular matrix binding|fibrinogen binding|fibroblast growth factor binding|fibronectin binding|heparin binding|integrin binding|laminin binding|low-density lipoprotein particle binding|phosphatidylserine binding|protein binding|transforming growth factor beta binding	activation of MAPK activity|behavioral response to pain|blood vessel morphogenesis|cell adhesion|cell cycle arrest|cell migration|cellular response to nitric oxide|endocardial cushion development|engulfment of apoptotic cell|extracellular matrix organization|growth plate cartilage development|growth plate cartilage development|inflammatory response|inflammatory response|negative regulation of ang…	cell surface|cytoplasm|endoplasmic reticulum|external side of plasma membrane|extracellular matrix|extracellular region|extracellular space|extracellular space|extracellular space|fibrinogen complex|platelet alpha granule|sarcoplasmic reticulum|secretory granule
Tnf	GEA00003864	Tnf_3864_i1	CAAATGGCCTCCCTCTCATCA	TGGGCTACAGGCTTGTCAC	NM_013693.2	NM_013693.2	DIF|Tnfa|TNF-a|TNFSF2|Tnlg1f|Tnfsf1a|TNFalpha|TNF-alpha	tumor necrosis factor	cytokine activity|cytokine activity|identical protein binding|protease binding|protease binding|protein binding|transcription regulatory region DNA binding|tumor necrosis factor receptor binding|tumor necrosis factor receptor binding|tumor necrosis factor receptor binding|tumor necrosis factor receptor binding	JNK cascade|MAPK cascade|activation of MAPK activity|activation of MAPKKK activity|activation of cysteine-type endopeptidase activity involved in apoptotic process|activation of cysteine-type endopeptidase activity involved in apoptotic process|animal organ morphogenesis|apoptotic process|apoptotic signaling pathway|calcium-mediated signaling|cell activation|cell proliferation|cellular extravasat…	cell surface|external side of plasma membrane|extracellular region|extracellular space|extracellular space|integral component of membrane|integral component of plasma membrane|integral component of plasma membrane|intracellular|membrane|membrane raft|membrane raft|phagocytic cup|plasma membrane|recycling endosome|secretory granule
TRIM29	GEP00089480	TRIM29_89480_i5	TCCAAGGAGACCAACCAGAA	TCCCAGACCCTGGAGGTATA	NM_023655.N	NM_023655	AI119726|1110047J21Rik|2810431N19Rik|4732461M22Rik	tripartite motif-containing 29	cadherin binding involved in cell-cell adhesion|identical protein binding|metal ion binding|p53 binding|protein binding|zinc ion binding	immune system process|innate immune response|negative regulation of protein localization to nucleus|negative regulation of transcription by RNA polymerase II	cell-cell adherens junction|cytoplasm|intracellular|lysosome
Vegfa	GEA00012621	Vegfa_12621_i3	CCAGCACATAGGAGAGATGAG	CTGGCTTTGTTCTGTCTTTCTT	NM_001025250.3	NM_001110268.1|NM_001110267.1|NM_001110266.1|NM_001025257.3|NM_009505.4|NM_001025250.3	Vpf|Vegf	vascular endothelial growth factor A	chemoattractant activity|chemoattractant activity|cytokine activity|extracellular matrix binding|fibronectin binding|growth factor activity|growth factor activity|growth factor activity|growth factor binding|heparin binding|heparin binding|identical protein binding|neuropilin binding|platelet-derived growth factor receptor binding|protein binding|protein heterodimerization activity|protein homodi…	T-helper 1 type immune response|VEGF-activated neuropilin signaling pathway|VEGF-activated neuropilin signaling pathway|activation of protein kinase activity|angiogenesis|angiogenesis|angiogenesis|angiogenesis|angiogenesis|angiogenesis involved in coronary vascular morphogenesis|artery morphogenesis|basophil chemotaxis|blood vessel development|blood vessel endothelial cell proliferation involved …	basement membrane|cell surface|cytoplasm|cytoplasm|extracellular region|extracellular space|extracellular space|extracellular space|membrane|nucleus|plasma membrane|secretory granule|vesicle
WNT4	GEA00012128	WNT4_12128_i1	TCTTTGGGAAGGTGGTGACA	CATGCCCTTGTCACTGCAAA	NM_009523.1	NM_009523.1	Wnt-4	wingless-type MMTV integration site family, member 4	frizzled binding|frizzled binding|protein binding|signaling receptor binding|transcription corepressor activity	T cell differentiation in thymus|Wnt signaling pathway|Wnt signaling pathway|anatomical structure development|androgen biosynthetic process|branching involved in ureteric bud morphogenesis|branching morphogenesis of an epithelial tube|canonical Wnt signaling pathway|canonical Wnt signaling pathway|canonical Wnt signaling pathway|cell differentiation|cell fate commitment|cell fate commitment|cell-…	Golgi apparatus|cell surface|cytoplasm|extracellular region|extracellular space|extracellular space|extracellular space
WNT5A	GEP00089482	WNT5A_89482_i1	TCCTTCGCCCAGGTTGTTATA	CAGAGAGGCTGTGCACCTA	NM_009524.N	NM_009524|NM_001256224	Wnt-5a|8030457G12Rik	wingless-type MMTV integration site family, member 5A	DNA binding transcription factor activity|chemoattractant activity involved in axon guidance|cytokine activity|frizzled binding|frizzled binding|frizzled binding|frizzled binding|protein binding|protein domain specific binding|receptor tyrosine kinase-like orphan receptor binding|signaling receptor binding|signaling receptor binding|transcription regulatory region DNA binding	JNK cascade|Wnt signaling pathway|Wnt signaling pathway|Wnt signaling pathway|Wnt signaling pathway involved in midbrain dopaminergic neuron differentiation|Wnt signaling pathway, calcium modulating pathway|Wnt signaling pathway, calcium modulating pathway|Wnt signaling pathway, calcium modulating pathway|Wnt signaling pathway, planar cell polarity pathway|Wnt signaling pathway, planar cell polar…	cell surface|cytoplasm|extracellular region|extracellular space|extracellular space
